# Supplementary material for: Teriflunomide shifts the astrocytic bioenergetic profile from oxidative metabolism to glycolysis and attenuates TNFα-induced inflammatory responses
Source: PubMed Central journal article supplement (PMC8866412; doi:10.1038/s41598-022-07024-7), 2022-02-23

1C

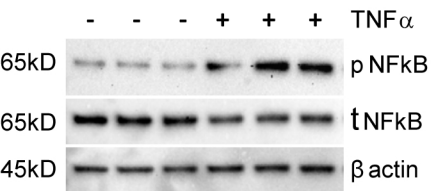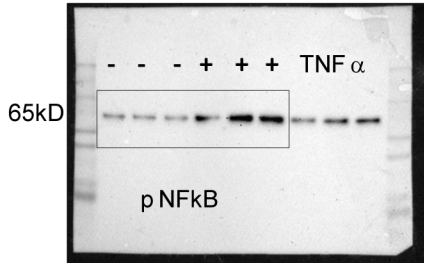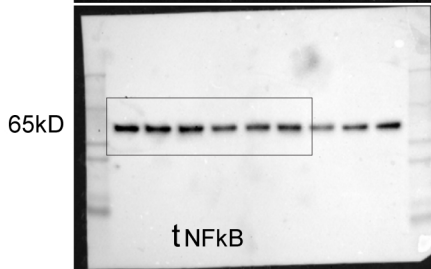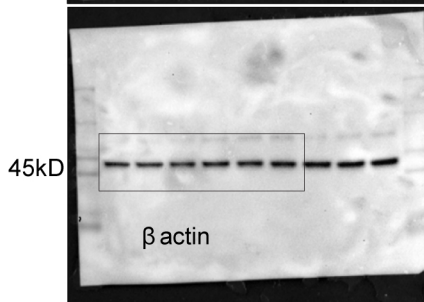

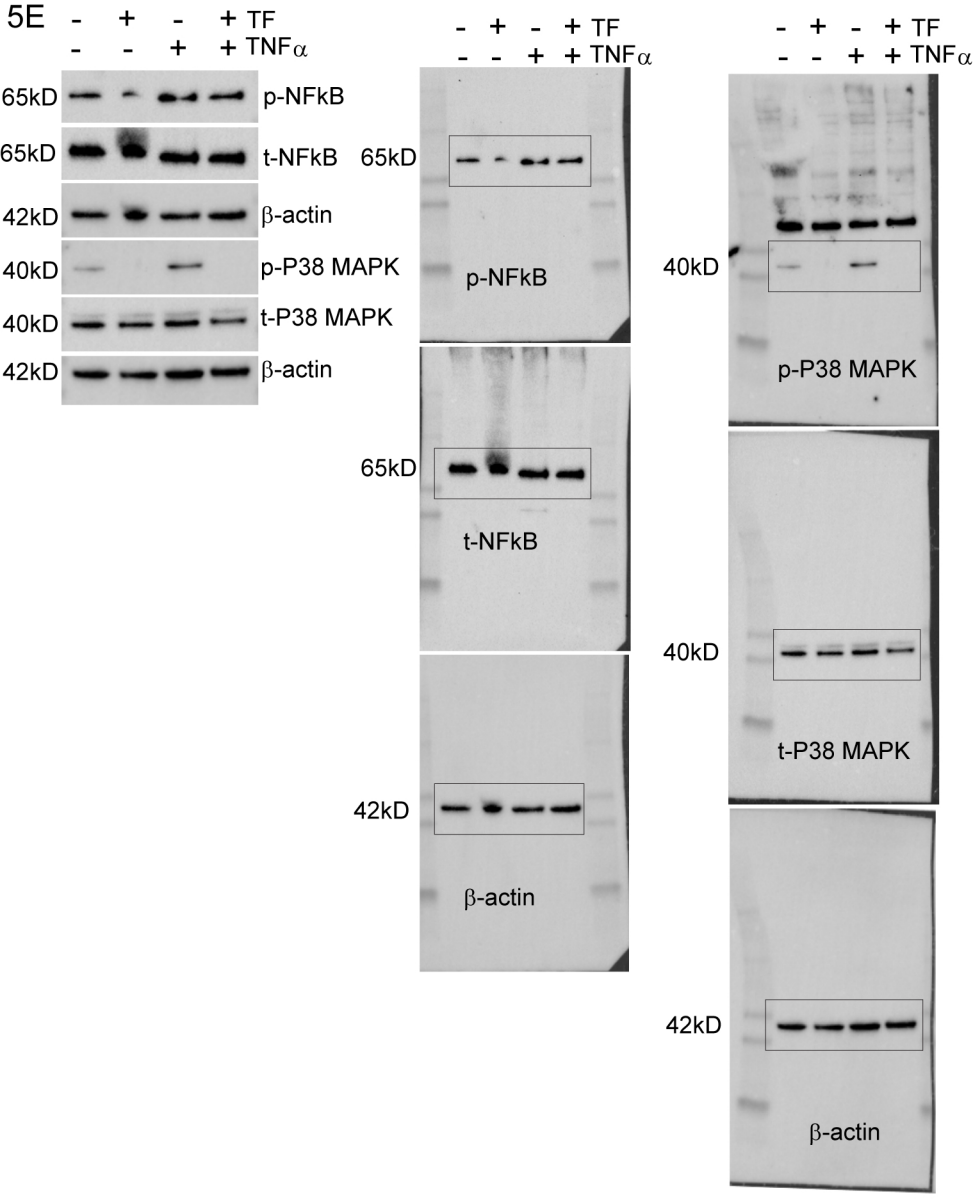

Supplement: 41598_2022_7024_MOESM2_ESM.pdf [file 41598_2022_7024_MOESM2_ESM.pdf]
